# Supplementary material for: Enhancing thermometric precision: modulating the temperature of maximum sensitivity via erbium dopant addition in Ba2GdV3O11:Tm3+/Yb3+ nano phosphors
Source: Royal Society of Chemistry journal article supplement (doi:10.1039/d4ma00699b), 2024-01-01
Supplement: d4ma00699b1.pdf [file d4ma00699b1.pdf]

## Supporting Information

### **Enhancing Thermometric Precision: Modulating Temperature of Maximum Sensitivity via Erbium Dopant Addition in Ba<sub>2</sub>GdV<sub>3</sub>O<sub>11</sub>: Tm<sup>3+</sup>/Yb<sup>3+</sup> Nano Phosphors**

Ikhlas Kachou <sup>(a)</sup>, Kamel Saidi <sup>(a)</sup>, Christian Hernández-Álvarez<sup>(b)</sup>, Mohamed Dammak<sup>(a)\*</sup>,  
Inocencio R. Martín <sup>(b)</sup>

<sup>a</sup>Laboratoire de Physique Appliquée, Groupe des Matériaux Luminescents, Faculté des Sciences de Sfax, Département de Physique, Université de Sfax, BP 1171 Sfax, Tunisia. E-mail: [\\_madidammak@yahoo.fr](mailto:_madidammak@yahoo.fr)

<sup>b</sup>Universidad de La Laguna, Departamento de Física, MALTA-Consolider Team, IMN and IUdEA Apdo. Correos 456, E-38206, San Cristóbal de La Laguna, Santa Cruz de Tenerife, Spain.

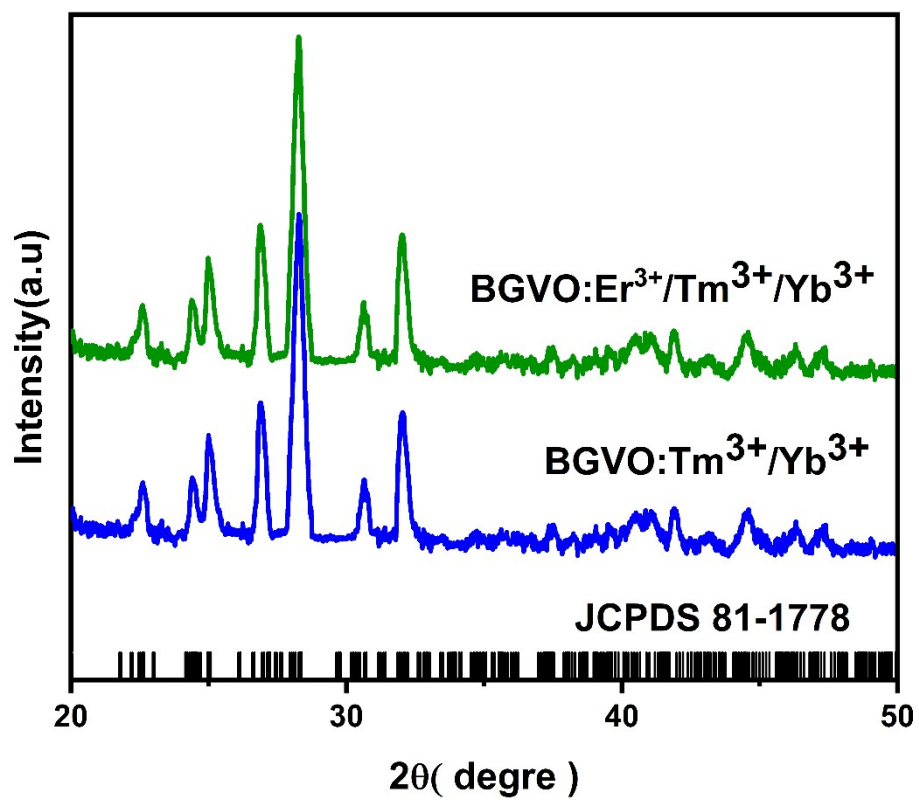

**Figure S 1:** XRD patterns of BGVO doped Tm<sup>3+</sup>/Yb<sup>3+</sup> and Er<sup>3+</sup>/Tm<sup>3+</sup>/Yb<sup>3+</sup>.

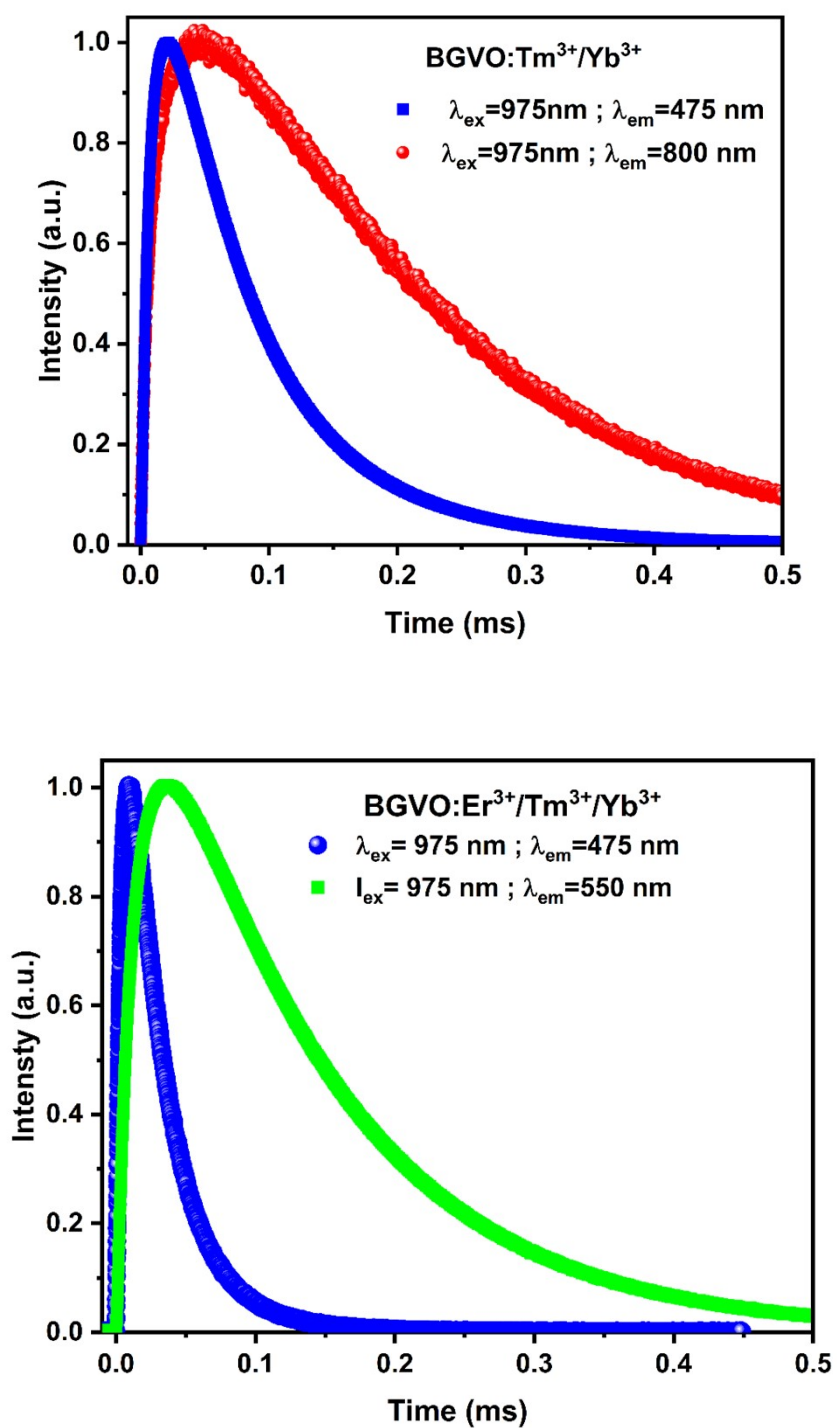

**Figure S2:** UC emission decay curves of Tm<sup>3+</sup>/Yb<sup>3+</sup> doped BGVO (a) emission 800nm , (b) emission 475 nm and (c) 650 nm with excitation at 975 nm.

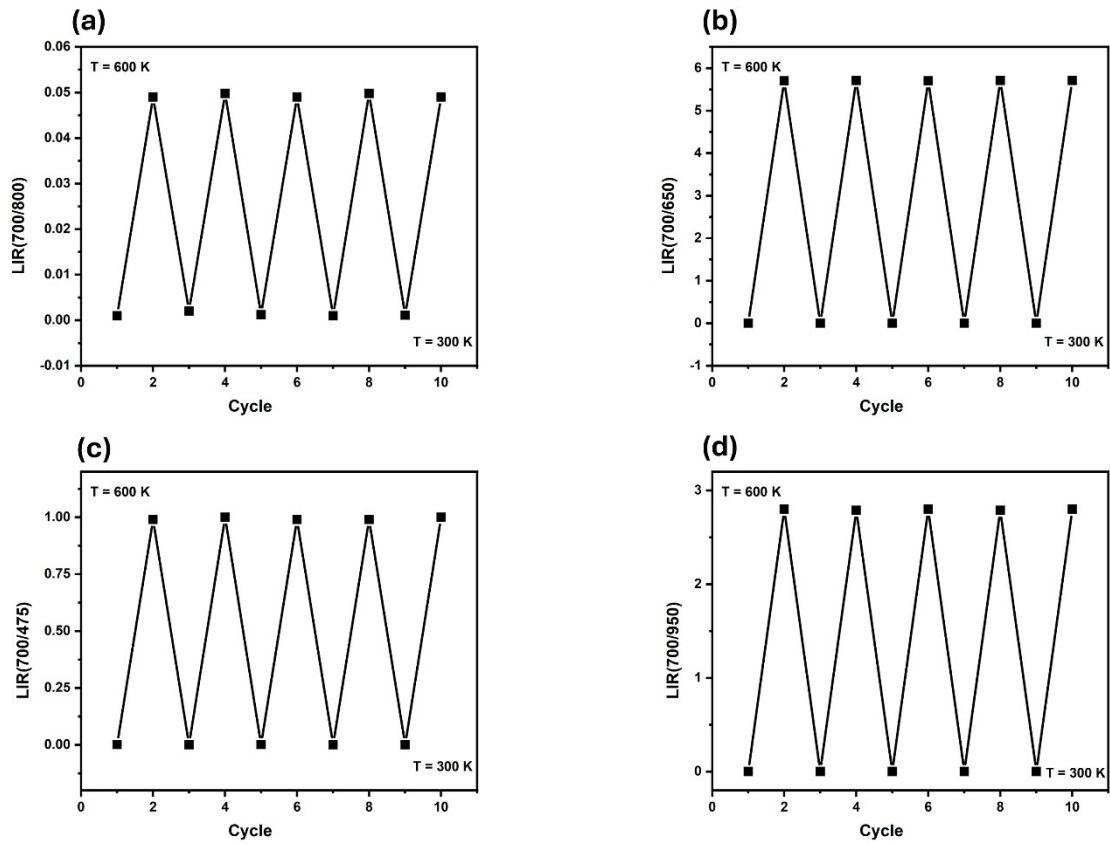

**Fig. S3:** Repeatability assessment (R) (a) 700/800 nm, (b) 700/650 nm (c) 700/475 nm and (d) 700/950 for  $\text{Ba}_2\text{GdV}_3\text{O}_{11}:\text{Er}^{3+}/\text{Tm}^{3+}/\text{Yb}^{3+}$

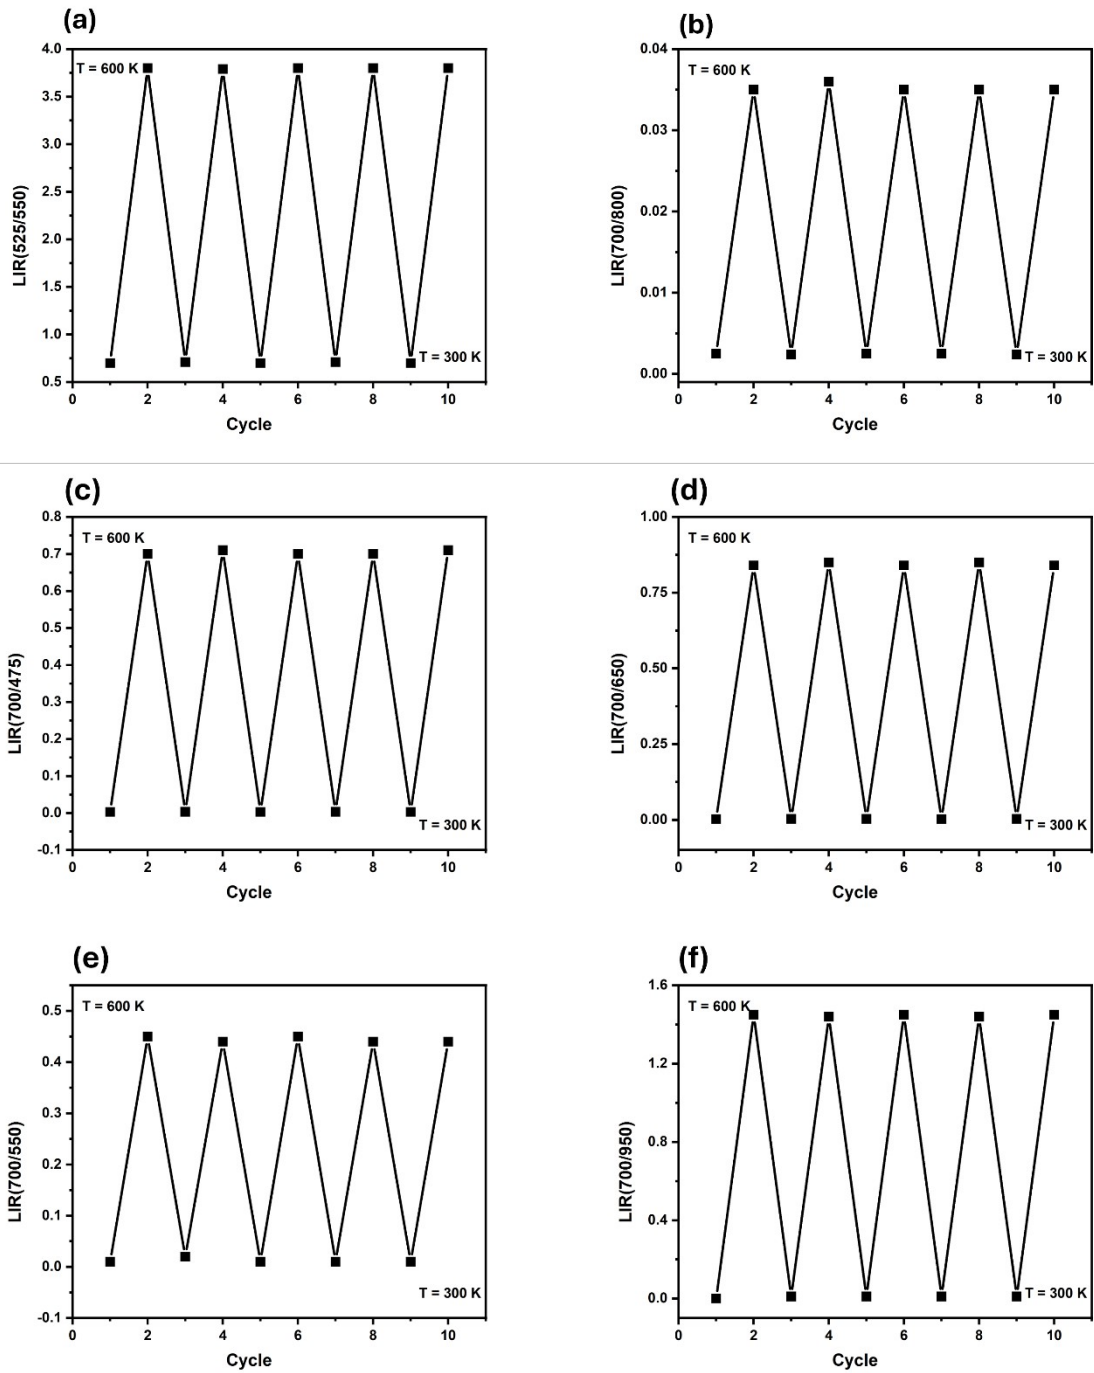

**Fig. S4:** Repeatability assessment (R) (a) 525/550 nm (b) 700/800 nm (c) 700/475 nm (d) 700/650 nm (e) 700/550 nm and (f) 700/950 nm for  $\text{Ba}_2\text{GdV}_3\text{O}_{11}:\text{Tm}^{3+}/\text{Yb}^{3+}$
